# Supplementary figures and images for: Using surface-induced ordering to probe the isotropic-to-nematic transition for semiflexible polymers
Source: Royal Society of Chemistry journal article supplement (doi:10.1039/c6sm01258b), 2016-01-01

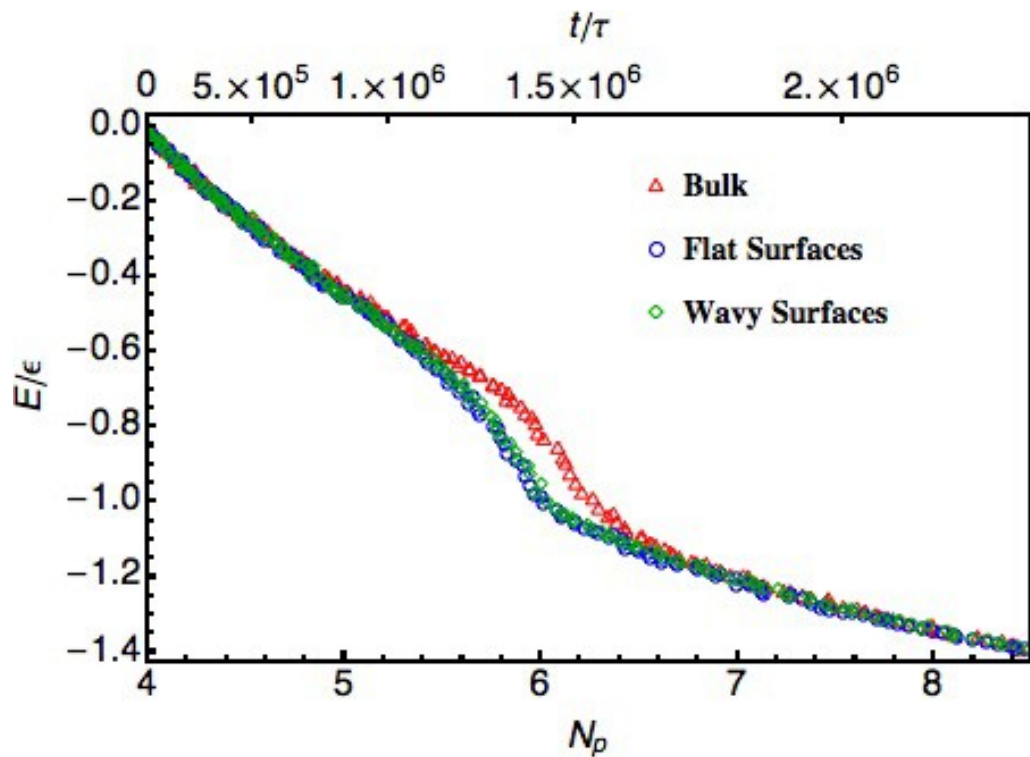

Supplement: c6sm01258b3.pdf [file c6sm01258b3.pdf]

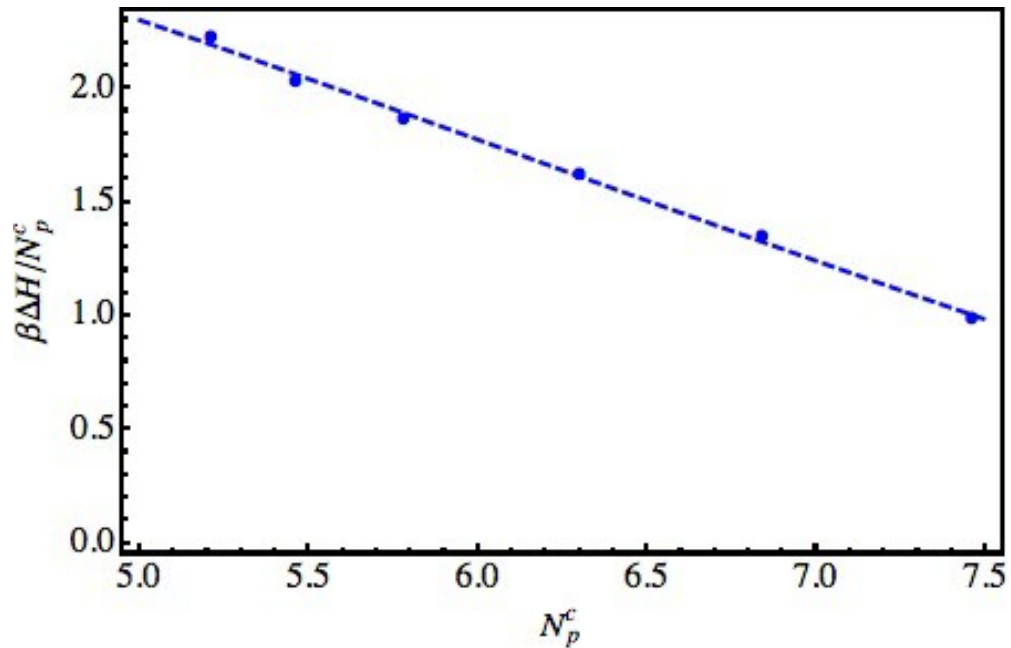

Supplement: c6sm01258b4.pdf [file c6sm01258b4.pdf]

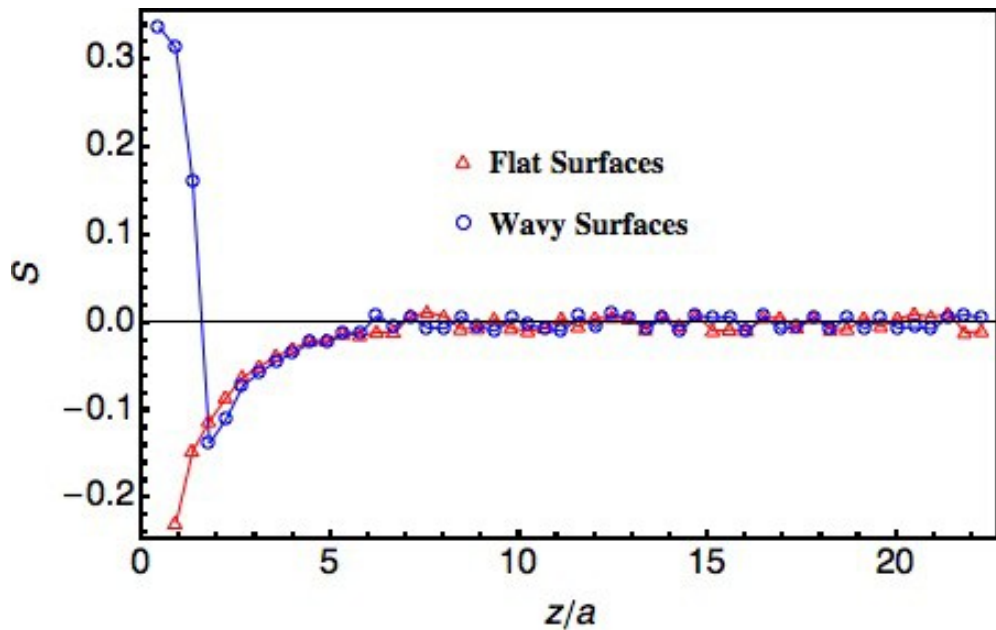

Supplement: c6sm01258b5.pdf [file c6sm01258b5.pdf]

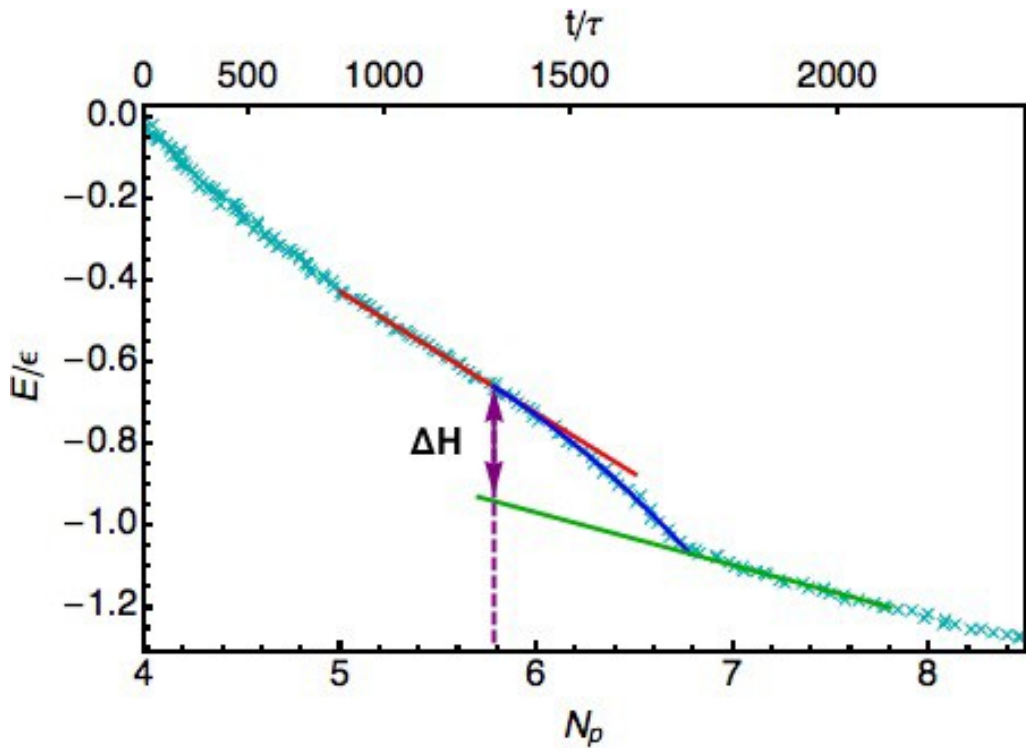

Supplement: c6sm01258b6.pdf [file c6sm01258b6.pdf]

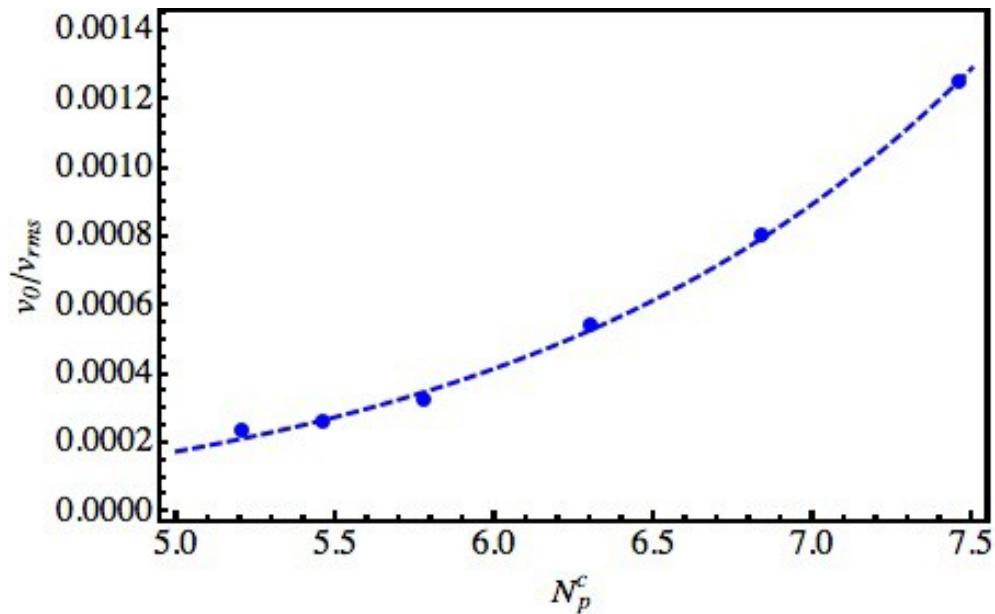

Supplement: c6sm01258b8.pdf [file c6sm01258b8.pdf]

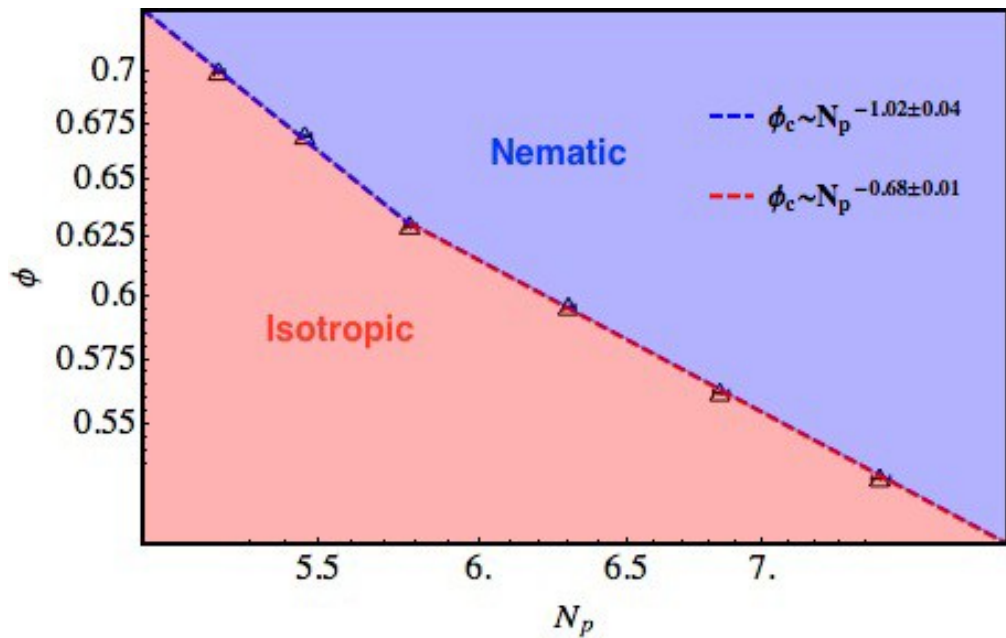

Supplement: c6sm01258b9.pdf [file c6sm01258b9.pdf]
